# Supplementary material
Source: Research Square preprint supplement (doi:10.21203/rs.3.rs-9626240/v1)
Supplement: Supplementary file 1 [file a996f50363db2f427e687489.docx]

*Supplementary Data*

**From Water to Fish: Microplastic Exposure and Ecological Risk in a Tropical Freshwater Fishery Lake in the Philippines**

Ariel B. Lanceta Jr a, Jocelyn D. Bantigue a, Mark Ariel D. Malto b

a Graduate School, State University of Northern Negros, Sagay City, Negros Occidental, Philippines

b Fisheries Department, Sorsogon State University, Magallanes Campus, Aguada Norte, Magallanes, Sorsogon 4705, Philippines

Correspondence: Mark Ariel D. Malto

Email: madmalto@sorsu.edu.ph


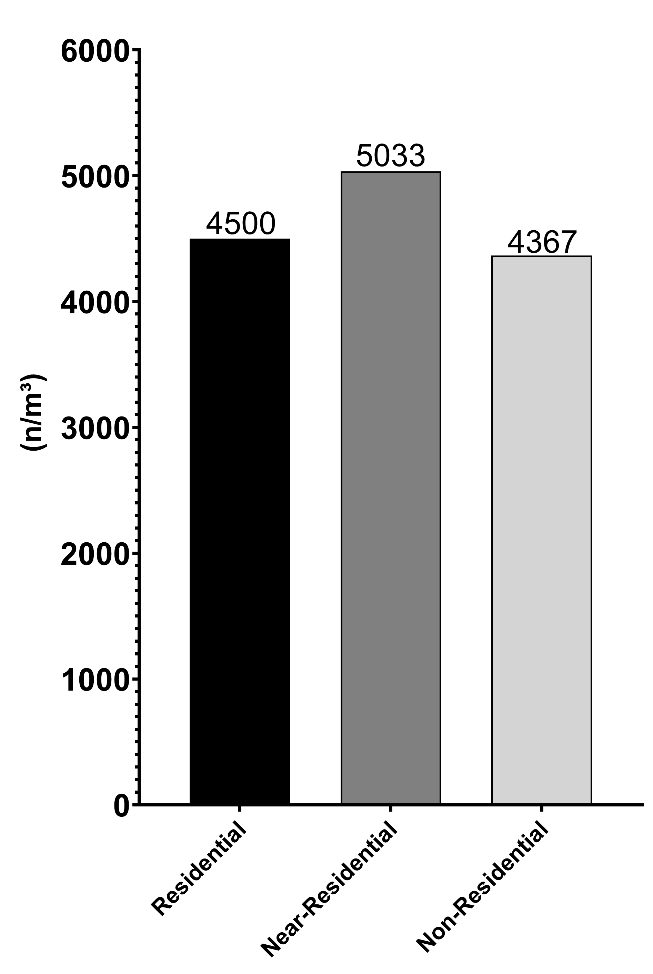


**Figure S1.** Mean microplastics concentration (particles/m³) among the sampling sites of Lake Sampaloc. Differences among zones were evaluated using one-way ANOVA and Kruskal–Wallis tests, which indicated no significant differences in total MP abundance (p > 0.05).


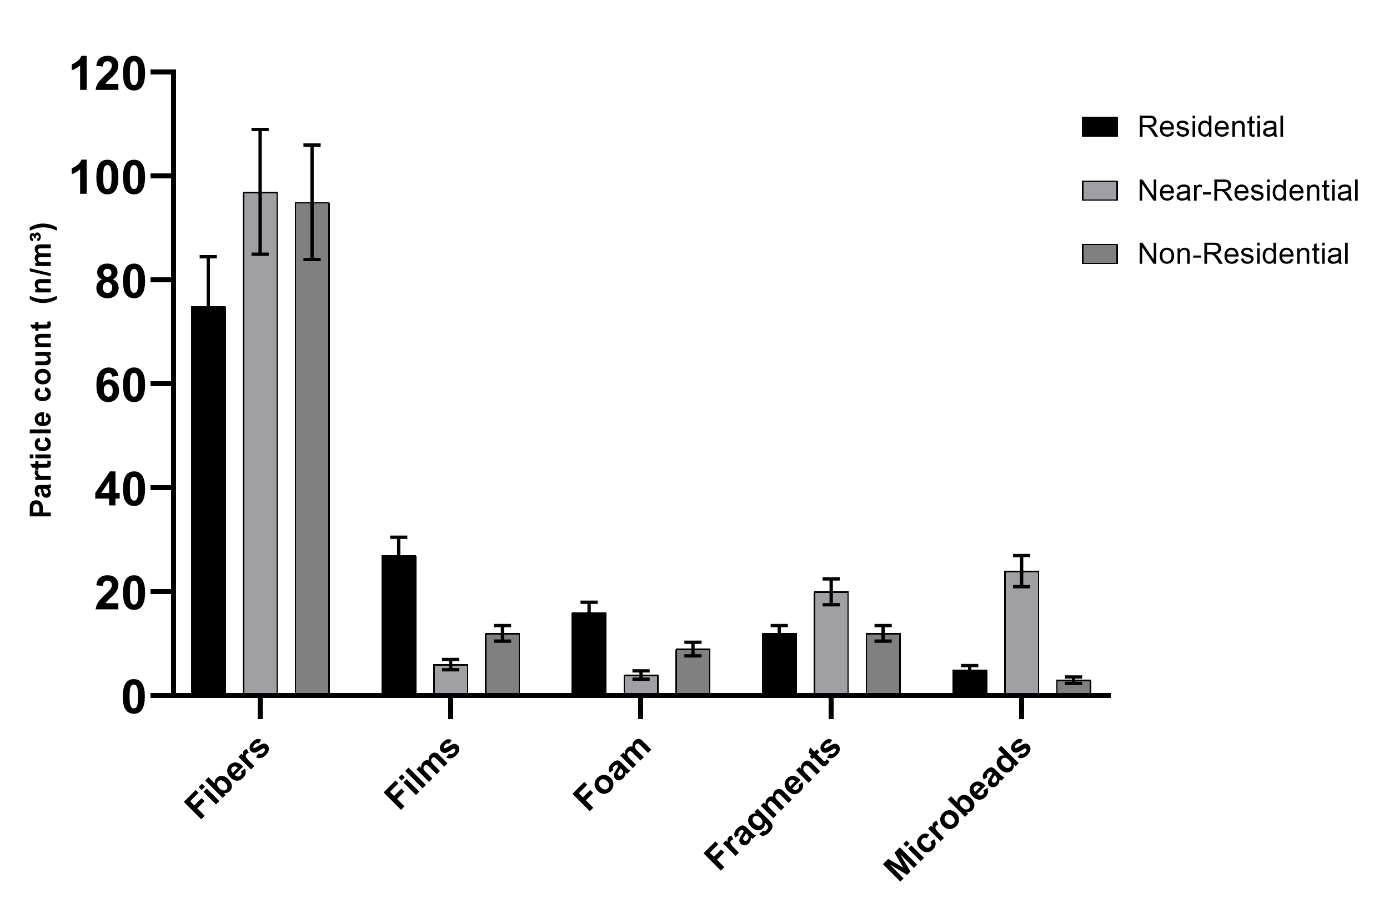


**Figure S2.** Microplastics shape characteristics among residential, near residential and non-residential zone of Lake Sampaloc. Differences in morphotype composition among zones were assessed using a chi-square test of independence, revealing significant compositional differences (p < 0.05).


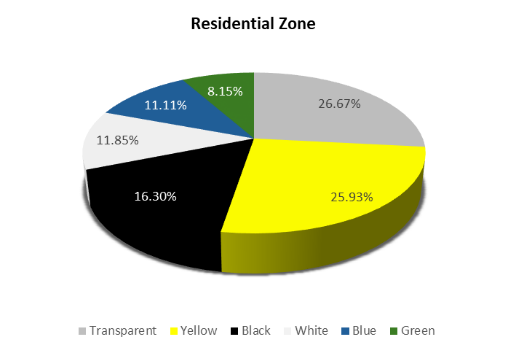

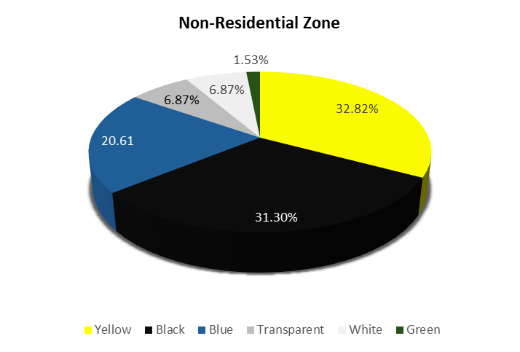

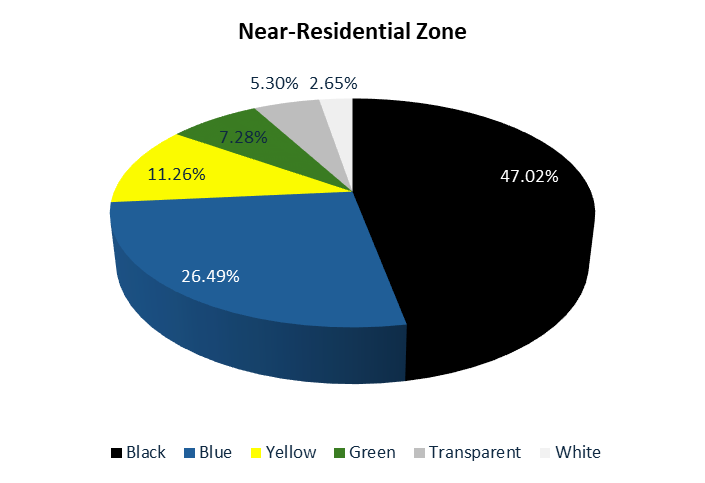


**Figure S3.** Microplastics color characteristics among residential, near residential and non-residential zones of Lake Sampaloc. Spatial differences in color composition were evaluated using a chi-square test, indicating significant variation among zones (p < 0.05).


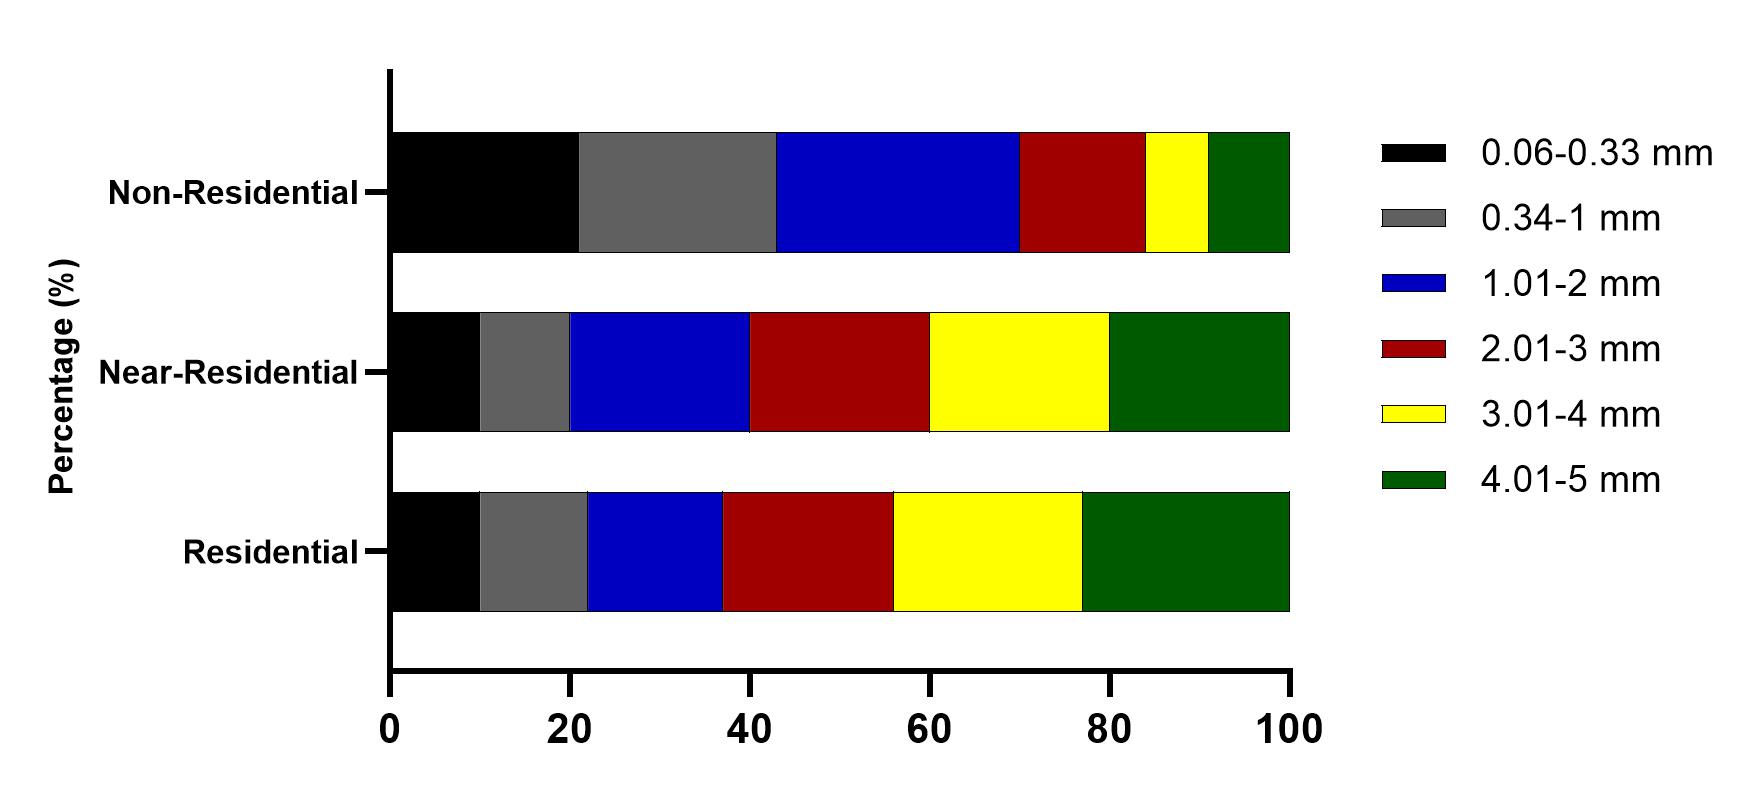


**Figure S4.** Microplastics size characteristics among residential, near residential and non-residential zones of Lake Sampaloc. Differences among zones were tested using a chi-square test of independence, showing no significant variation in size distribution (p > 0.05).


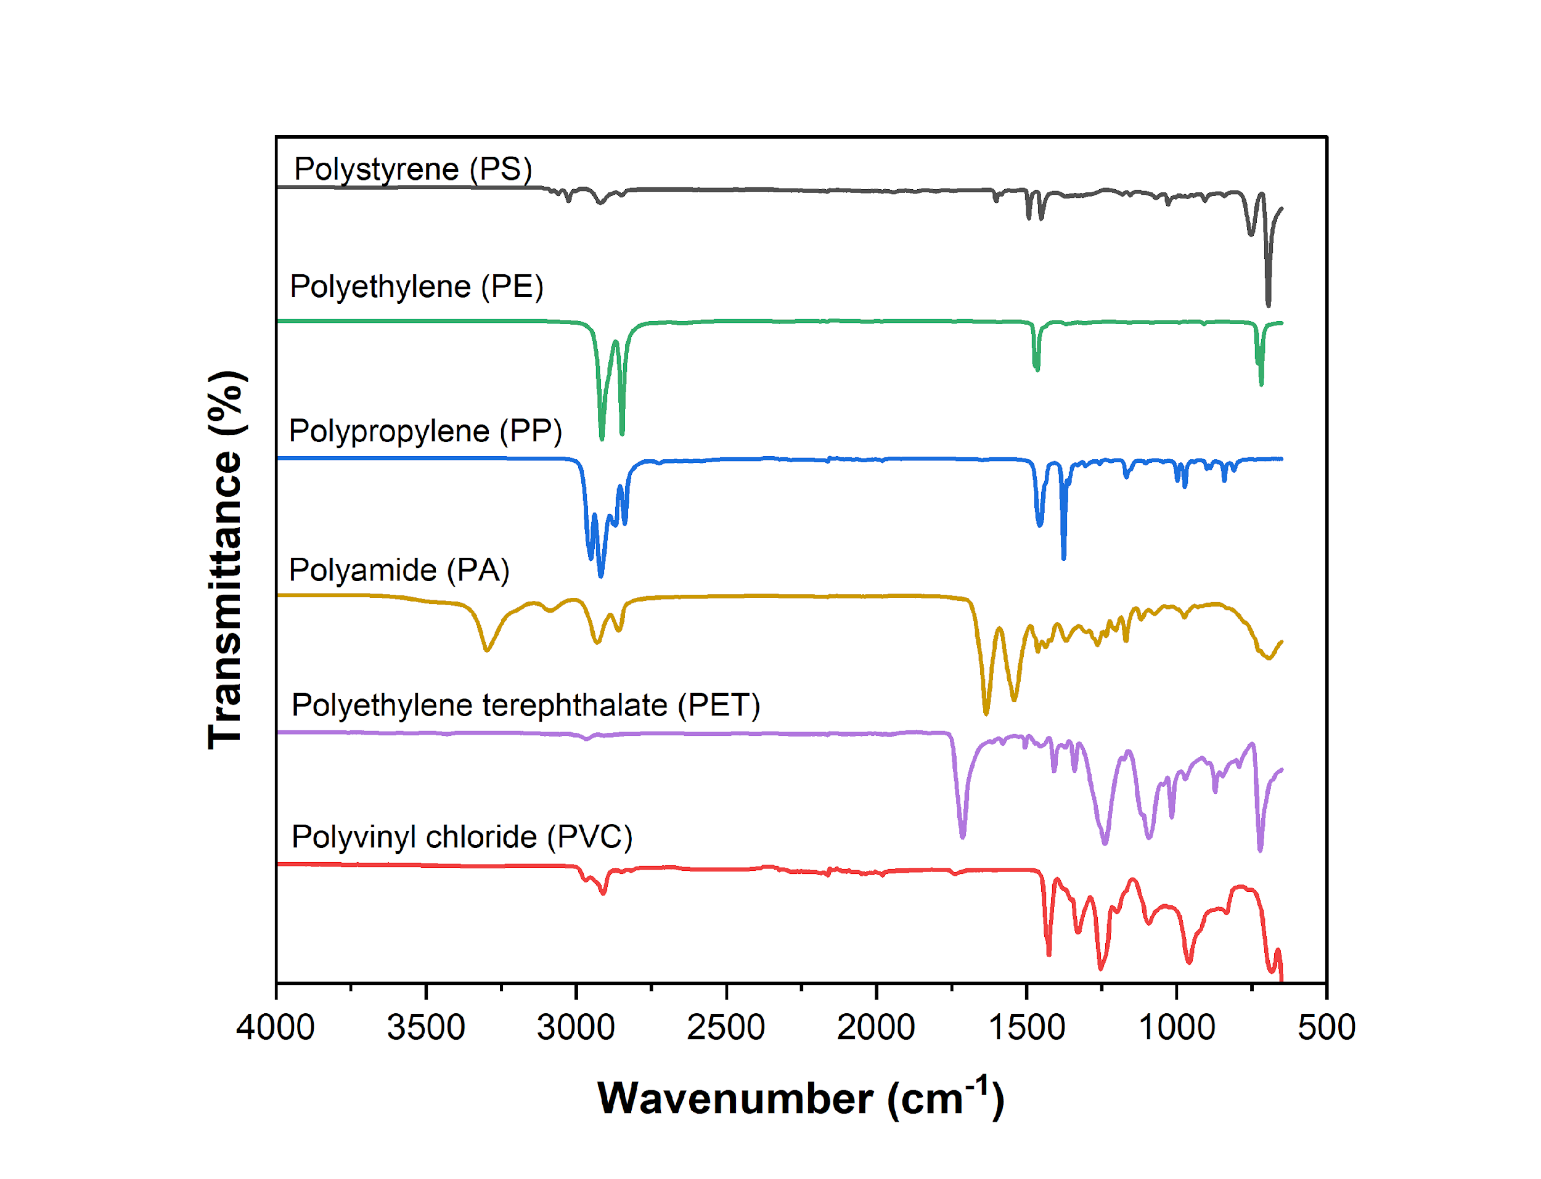


**Figure S5.** FTIR (Fourier Transform Infrared Spectroscopy) spectra of different polymer types detected in Lake Sampaloc.


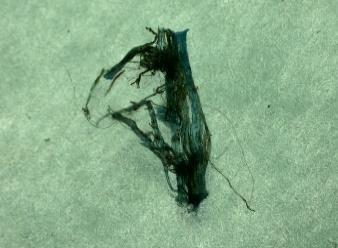

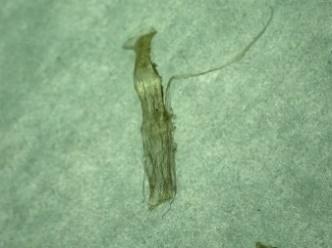

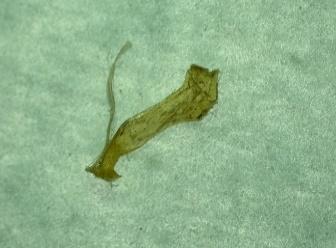

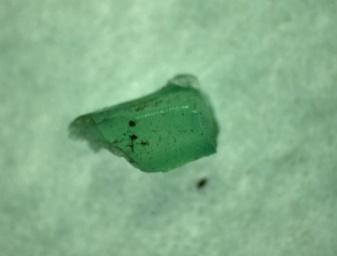

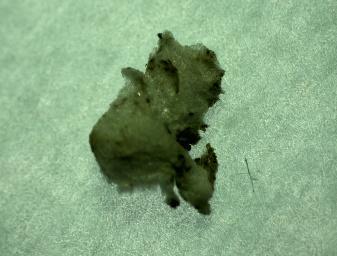

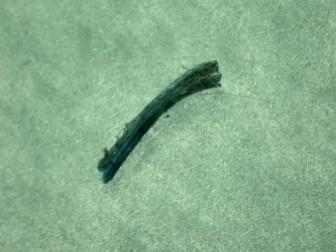

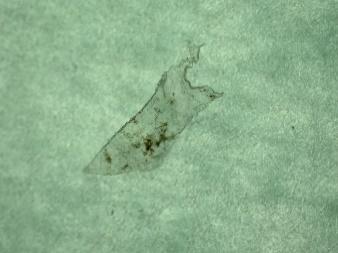

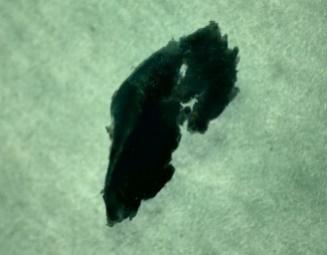

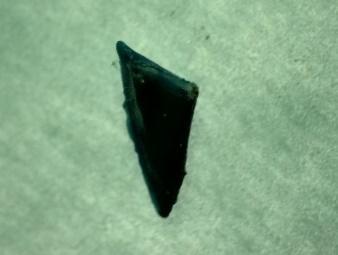

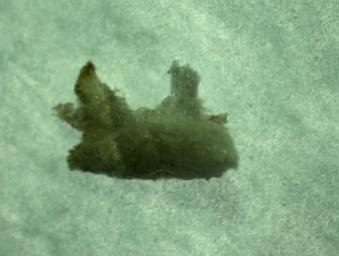

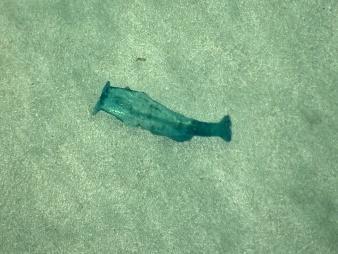

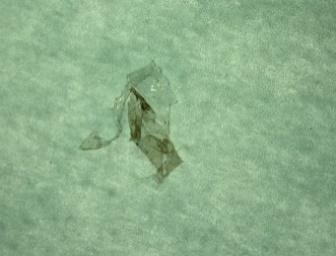


**Figure S6.** Sample photographs of microplastics under the stereomicroscope.


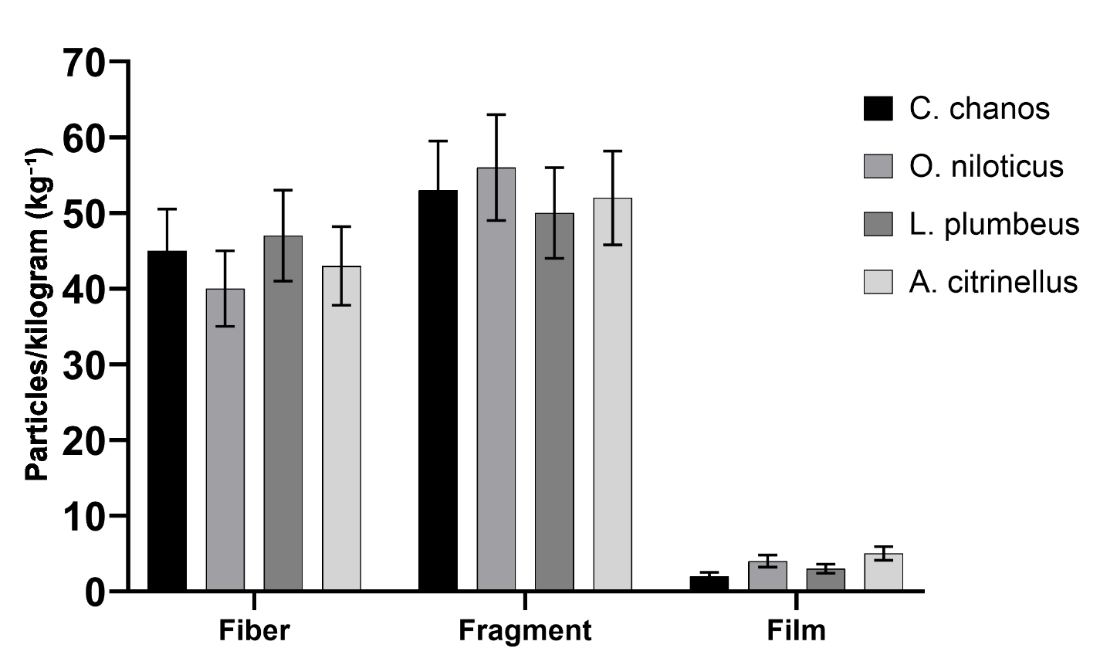


**Figure S7.** Microplastic morphologies in fish samples. Differences in morphotype composition among species were assessed using a chi-square test, which indicated no significant interspecific differences (p > 0.05).


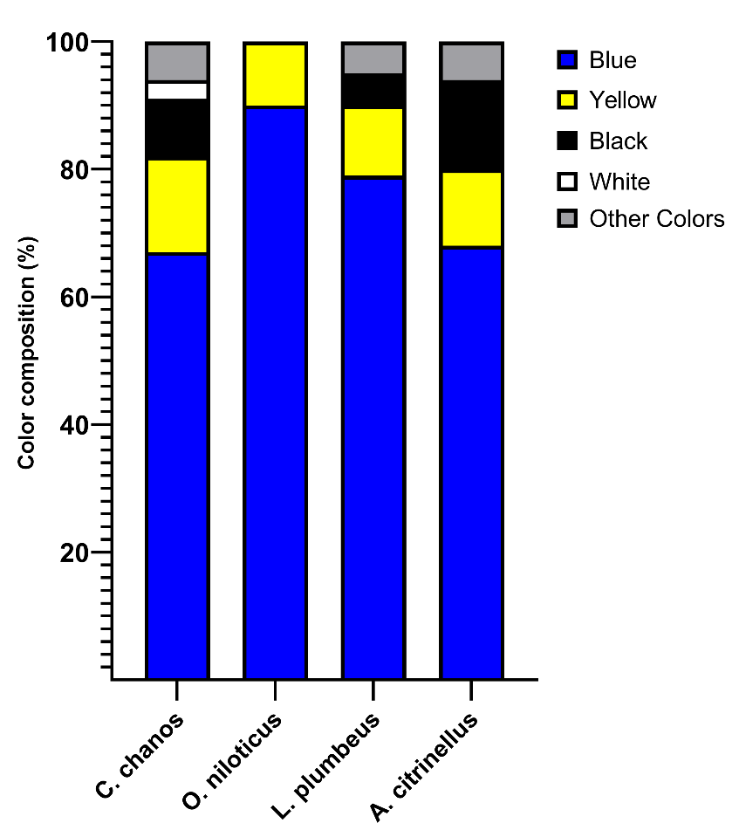


**Figure S8.** Color characteristics of microplastics recovered from fish samples. Species-level differences were evaluated using a chi-square test of independence, revealing no significant variation in color composition among species (p > 0.05).


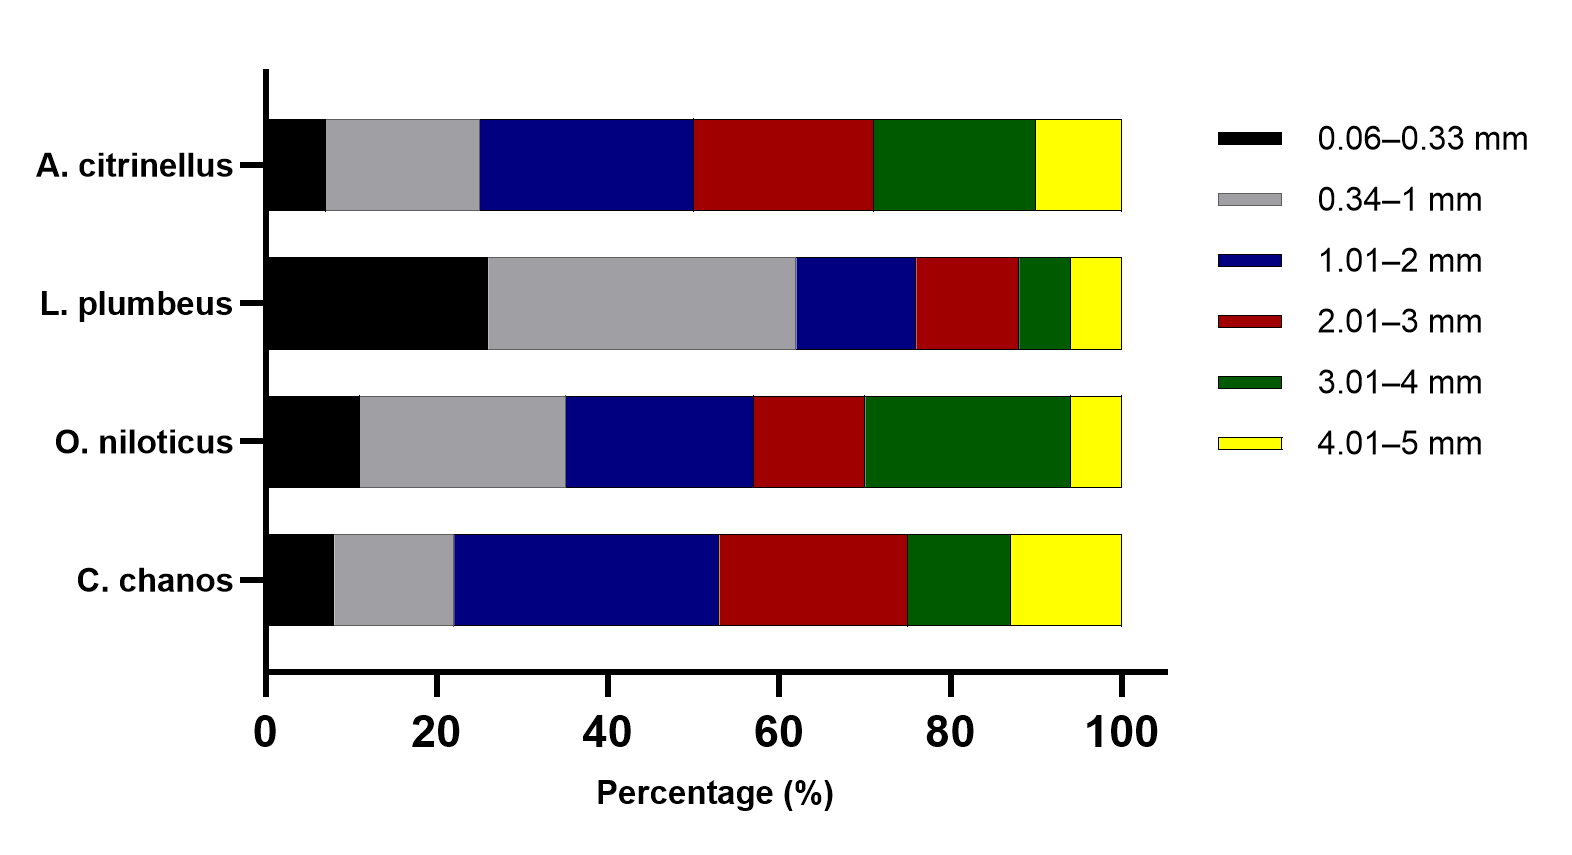


**Figure S9.** Size characteristics of microplastics recovered from fish samples. Differences in size distribution among species were assessed using a chi-square test, which indicated significant interspecific variation (p < 0.05).


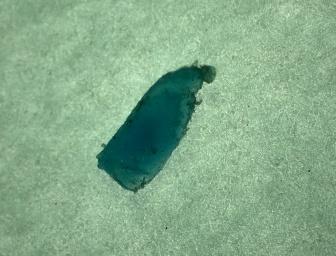

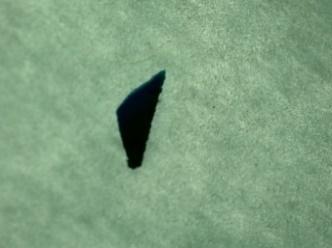

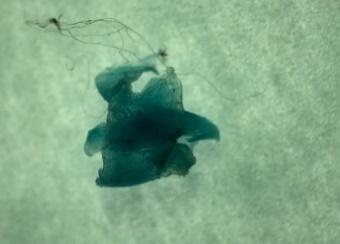

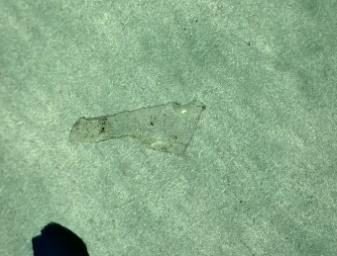

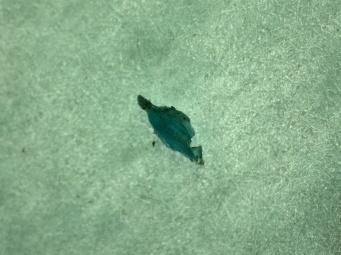

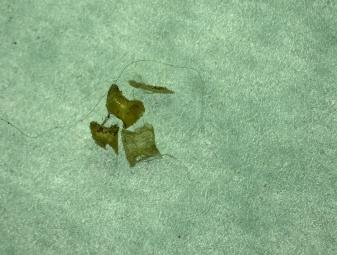

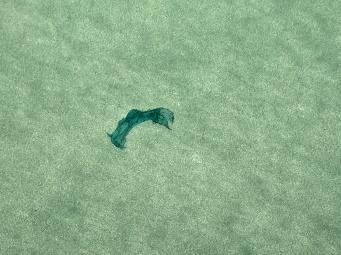

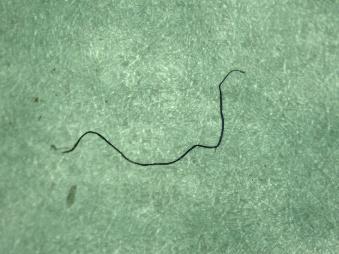


**Figure S10.** Sample photomicrographs of microplastics recovered from fish samples, captured under a stereomicroscope.


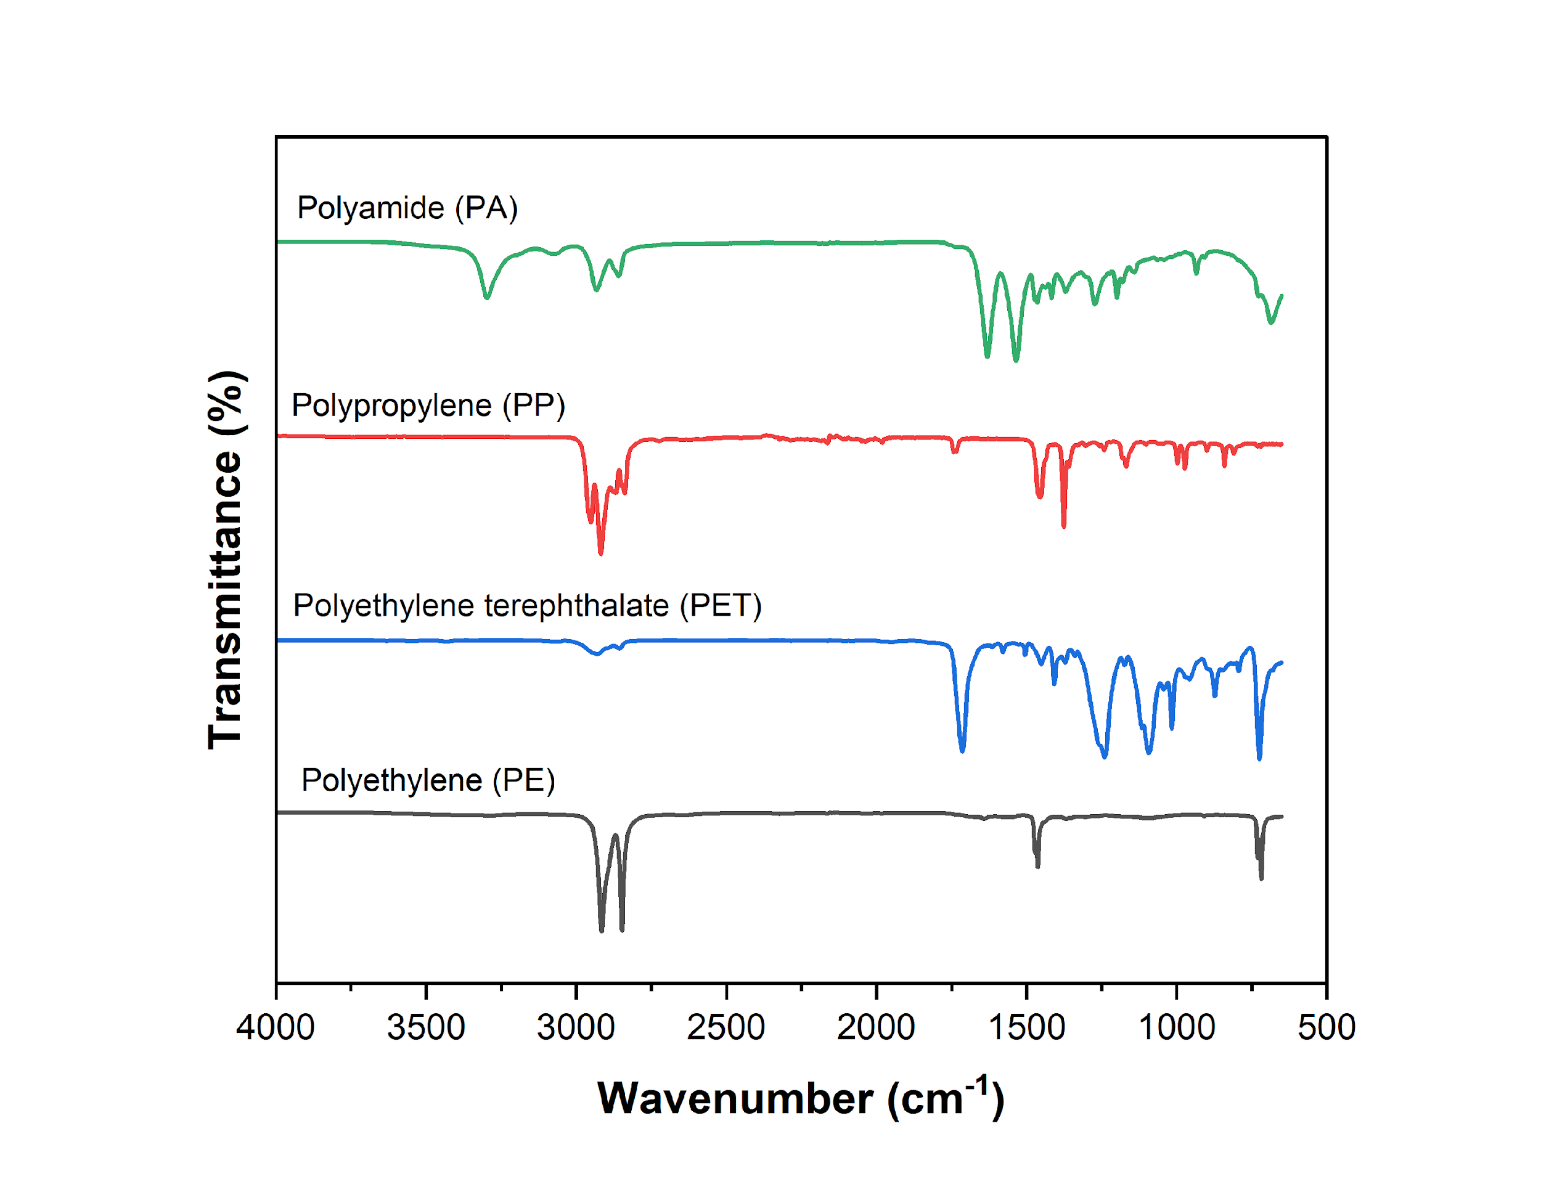


**Figure S11.** (FTIR (Fourier Transform Infrared Spectroscopy) spectra illustrating the different polymer types detected in fish samples.

**Table S1.** Information on sample fish.

| No. | Fish species common name | Scientific name | Sampling area | *n* = fish | Feeding zone | | Mean ± SD (cm) | Mean ± SD (g) |
| --- | --- | --- | --- | --- | --- | --- | --- | --- |
| 1 | Bangus | *C. chanos* | Aquaculture | 25 | | Pelagic | 29.7 ± 1.43 | 335.86 ± 55.36 |
| 2 | Tilapia | *O. niloticus* | Aquaculture | 25 | | Pelagic | 21.34 ± 1.78 | 267.73 ± 64.39 |
| 3 | Ayungin | *L. plumbeus* | Wild Habitat | 25 | | Pelagic | 12.96 ± 0.17 | 31.64 ± 2.63 |
| 4 | Flower Horn | *A. citrinellus* | Wild Habitat | 25 | | Pelagic | 14.73 ± 0.25 | 69.28 ± 1.58 |

**Table S2.** Definition and potential sources of microplastic types.

| **Microplastics Types** | **Definition** | **Potential Sources** |
| --- | --- | --- |
| Fragment | Hard, jagged plastic particle | Bottles, hard, sturdy plastic |
| Fiber | Fiber – thin or fibrous; straight plastic  filament – a thicker type of line | Fishing line/nets, clothing, or textiles |
| Film | Thin plain of flimsy plastic | Plastic bags, wrappers, or sheeting |
| Foam | Lightweight, sponge-like plastic | Foam floats, Styrofoam cushioning |
| Microbead | White, little squishy, rounded plastic particle | Facial cleanser, toothpaste, cosmetics, exfoliants |

**Note:** This table was adapted from Natuel et a 2023.

|  | **Length** | **Fish Weight** | **Gut Weight** | **Fiber** | **Film** | **Fragment** |
| --- | --- | --- | --- | --- | --- | --- |
| **Length** | — | 0.875432 | 0.861294 | 0.602813 | –0.348217 | –0.198765 |
| **Fish Weight** | 0.875432 | — | 0.928317 | 0.691204 | –0.438290 | –0.251903 |
| **Gut Weight** | 0.861294 | 0.928317 | — | 0.643918 | –0.393205 | –0.223871 |
| **Fiber** | 0.602813 | 0.691204 | 0.643918 | — | 0.503612 | 0.307284 |
| **Film** | –0.348217 | –0.438290 | –0.393205 | 0.503612 | — | 0.403581 |
| **Fragment** | –0.198765 | –0.251903 | –0.223871 | 0.307284 | 0.403581 | — |

**Table S3.** Pearson’s correlation coefficients for microplastic presence in fish, showing relationships between fish length, fish weight, gut weight, and types of microplastics (fiber, film, fragment).

**Note:** Overall mean Pearson correlation (including fish biometric parameters and microplastic types): r ≈ 0.58, indicating a moderate positive relationship. Mean correlation among fish biometric parameters alone: r ≈ 0.89, indicating strong positive relationships.

**Table S4.** Mean (± SD) counts and relative abundance (%) of microplastic morphotypes in surface water across different zones of Lake Sampaloc

| **Zone** | **Fibers (mean ± SD)** | **Microbeads (mean ± SD)** | **Fragments (mean ± SD)** | **Films (mean ± SD)** | **Foam (mean ± SD)** |
| --- | --- | --- | --- | --- | --- |
| Residential | 75 ± 9.5 | 5 ± 0.8 | 10 ± 1.2 | 3 ± 0.5 | 2 ± 0.3 |
| Near-Residential | 97 ± 12 | 24 ± 3.0 | 20 ± 2.5 | 1 ± 0.2 | 1 ± 0.2 |
| Non-Residential | 95 ± 11 | 3 ± 0.6 | 11 ± 1.0 | 3 ± 0.4 | 2 ± 0.3 |

Note: Mean ± SD of microplastic counts per 10 L sample; percentages show relative contribution of each morphotype. All values are blank-corrected.

**Table S5.** Distribution of microplastic morphotypes in fish from Sampaloc Lake

| **Species** | **Morphotype** | **Mean ± SD (particles/fish)** | **% of total MPs** |
| --- | --- | --- | --- |
| *Chanos chanos* | Fiber | 12 ± 2 | 19% |
| Fragment | 48 ± 5 | 75% |
| Film | 3 ± 1 | 5% |
| *Oreochromis niloticus* | Fiber | 10 ± 1.5 | 19% |
| Fragment | 40 ± 4 | 75% |
| Film | 3 ± 0.5 | 6% |
| *Leiopotherapon plumbeus* | Fiber | 8 ± 1.2 | 19% |
| Fragment | 30 ± 3 | 75% |
| Film | 2 ± 0.8 | 6% |
| *Amphilophus citrinellus* | Fiber | 9 ± 1.5 | 19% |
| Fragment | 35 ± 4 | 75% |
| Film | 3 ± 1 | 6% |

**Note:** Mean ± SD per fish; % = proportion of total microplastics per species. All counts are blank-corrected.
